# Supplementary material for: moBRCA-net: a breast cancer subtype classification framework based on multi-omics attention neural networks
Source: PubMed Central journal article supplement (PMC10131354; doi:10.1186/s12859-023-05273-5), 2023-04-26
Supplement: 12859_2023_5273_MOESM1_ESM.pdf [file 12859_2023_5273_MOESM1_ESM.pdf]

**SupplementaryMaterial S1.**

Table1. Hyperparameter optimization results based on the average accuracy for classifying breast cancer subtypes.

| Learning rate | Dimension of embedding vector | Dimension of encoding vector | # of hidden nodes in classification module | Dropout    | Average accuracy |
|---------------|-------------------------------|------------------------------|--------------------------------------------|------------|------------------|
| 1e-3          | 64                            | 32                           | 50                                         | 0.7        | 0.8679           |
| 1e-3          | 64                            | 32                           | 100                                        | 0.6        | 0.8490           |
| 1e-3          | 64                            | 32                           | 100                                        | 0.7        | 0.8773           |
| 1e-2          | 64                            | 32                           | 100                                        | 0.7        | 0.8679           |
| 1e-2          | 64                            | 32                           | 200                                        | 0.8        | 0.8490           |
| 1e-3          | 64                            | 32                           | 300                                        | 0.6        | 0.8584           |
| 1e-2          | 128                           | 32                           | 200                                        | 0.7        | 0.8490           |
| 1e-2          | 128                           | 64                           | 50                                         | 0.7        | 0.8773           |
| 1e-3          | 128                           | 64                           | 100                                        | 0.7        | 0.8773           |
| 1e-2          | 128                           | 64                           | 100                                        | 0.7        | 0.9230           |
| 1e-3          | 128                           | 64                           | 200                                        | 0.6        | 0.8679           |
| 1e-3          | 128                           | 64                           | 200                                        | 0.7        | 0.9079           |
| <b>1e-2</b>   | <b>128</b>                    | <b>64</b>                    | <b>200</b>                                 | <b>0.7</b> | <b>0.9433</b>    |
| 1e-2          | 128                           | 64                           | 200                                        | 0.8        | 0.8867           |
| 1e-2          | 128                           | 64                           | 300                                        | 0.7        | 0.8974           |
| 1e-3          | 256                           | 128                          | 100                                        | 0.7        | 0.8679           |
| 1e-3          | 256                           | 128                          | 200                                        | 0.7        | 0.8679           |

Table2. Classification accuracy results with the different number of selected features in multi-omics data integration.

| Number of selected DEGs | Number of features in the integrated multi-omics dataset |                 |          | Average accuracy |
|-------------------------|----------------------------------------------------------|-----------------|----------|------------------|
|                         | Gene expression                                          | DNA methylation | microRNA |                  |
| 800                     | 683                                                      | 683             | 213      | 0.9142           |
| 1000                    | 835                                                      | 835             | 228      | 0.9433           |
| 1500                    | 1078                                                     | 1078            | 229      | 0.8962           |

**Supplementary Material S2.**

Optimization results of the baseline methods with the different combination of the parameters. Grid search was adopted for the model tuning, and the hyperparameters showing the best accuracy were selected. Row with the bolded font are the hyperparameters selected.

| <b>Support vector machine (SVM)</b> |                       |                          |          |
|-------------------------------------|-----------------------|--------------------------|----------|
| Kernel                              | Penalty parameter (C) | RBF kernel coeff (Gamma) | Accruacy |
| RBF                                 | $2^{-5}$              | $2^{-15}$                | 0.478    |
| RBF                                 | $2^{-5}$              | $2^{-13}$                | 0.478    |
| RBF                                 | $2^{-5}$              | $2^{-11}$                | 0.478    |
| RBF                                 | $2^{-5}$              | $2^{-9}$                 | 0.478    |
| RBF                                 | $2^{-5}$              | $2^{-7}$                 | 0.478    |
| RBF                                 | $2^{-5}$              | $2^{-5}$                 | 0.478    |
| RBF                                 | $2^{-5}$              | $2^{-3}$                 | 0.478    |
| RBF                                 | $2^{-5}$              | $2^{-1}$                 | 0.478    |
| RBF                                 | $2^{-5}$              | $2^1$                    | 0.478    |
| RBF                                 | $2^{-5}$              | $2^3$                    | 0.478    |
| RBF                                 | $2^{-3}$              | $2^{-15}$                | 0.478    |
| RBF                                 | $2^{-3}$              | $2^{-13}$                | 0.478    |
| RBF                                 | $2^{-3}$              | $2^{-11}$                | 0.478    |
| RBF                                 | $2^{-3}$              | $2^{-9}$                 | 0.478    |
| RBF                                 | $2^{-3}$              | $2^{-7}$                 | 0.6384   |
| RBF                                 | $2^{-3}$              | $2^{-5}$                 | 0.6635   |
| RBF                                 | $2^{-3}$              | $2^{-3}$                 | 0.478    |
| RBF                                 | $2^{-3}$              | $2^{-1}$                 | 0.478    |
| RBF                                 | $2^{-3}$              | $2^1$                    | 0.478    |
| RBF                                 | $2^{-3}$              | $2^3$                    | 0.478    |
| RBF                                 | $2^{-1}$              | $2^{-15}$                | 0.478    |
| RBF                                 | $2^{-1}$              | $2^{-13}$                | 0.478    |
| RBF                                 | $2^{-1}$              | $2^{-11}$                | 0.478    |
| RBF                                 | $2^{-1}$              | $2^{-9}$                 | 0.6447   |
| RBF                                 | $2^{-1}$              | $2^{-7}$                 | 0.739    |
| RBF                                 | $2^{-1}$              | $2^{-5}$                 | 0.783    |
| RBF                                 | $2^{-1}$              | $2^{-3}$                 | 0.5975   |
| RBF                                 | $2^{-1}$              | $2^{-1}$                 | 0.478    |
| RBF                                 | $2^{-1}$              | $2^1$                    | 0.478    |
| RBF                                 | $2^{-1}$              | $2^3$                    | 0.478    |
| RBF                                 | $2^1$                 | $2^{-15}$                | 0.478    |
| RBF                                 | $2^1$                 | $2^{-13}$                | 0.478    |
| RBF                                 | $2^1$                 | $2^{-11}$                | 0.6447   |
| RBF                                 | $2^1$                 | $2^{-9}$                 | 0.7516   |
| RBF                                 | $2^1$                 | $2^{-7}$                 | 0.8082   |
| RBF                                 | $2^1$                 | $2^{-5}$                 | 0.8239   |
| RBF                                 | $2^1$                 | $2^{-3}$                 | 0.7107   |
| RBF                                 | $2^1$                 | $2^{-1}$                 | 0.478    |
| RBF                                 | $2^1$                 | $2^1$                    | 0.478    |
| RBF                                 | $2^1$                 | $2^3$                    | 0.478    |
| RBF                                 | $2^3$                 | $2^{-15}$                | 0.478    |
| RBF                                 | $2^3$                 | $2^{-13}$                | 0.6447   |
| RBF                                 | $2^3$                 | $2^{-11}$                | 0.7547   |

|            |                         |                            |               |
|------------|-------------------------|----------------------------|---------------|
| RBF        | $2^3$                   | $2^{-9}$                   | 0.8113        |
| <b>RBF</b> | <b><math>2^3</math></b> | <b><math>2^{-7}</math></b> | <b>0.8365</b> |
| RBF        | $2^3$                   | $2^{-5}$                   | 0.827         |
| RBF        | $2^3$                   | $2^{-3}$                   | 0.7107        |
| RBF        | $2^3$                   | $2^{-1}$                   | 0.478         |
| RBF        | $2^3$                   | $2^1$                      | 0.478         |
| RBF        | $2^3$                   | $2^3$                      | 0.478         |
| RBF        | $2^5$                   | $2^{-15}$                  | 0.6447        |
| RBF        | $2^5$                   | $2^{-13}$                  | 0.7547        |
| RBF        | $2^5$                   | $2^{-11}$                  | 0.8113        |
| RBF        | $2^5$                   | $2^{-9}$                   | 0.8333        |
| RBF        | $2^5$                   | $2^{-7}$                   | 0.8365        |
| RBF        | $2^5$                   | $2^{-5}$                   | 0.827         |
| RBF        | $2^5$                   | $2^{-3}$                   | 0.7107        |
| RBF        | $2^5$                   | $2^{-1}$                   | 0.478         |
| RBF        | $2^5$                   | $2^1$                      | 0.478         |
| RBF        | $2^5$                   | $2^3$                      | 0.478         |
| Linear     | $2^{-5}$                | -                          | 0.478         |
| Linear     | $2^{-3}$                | -                          | 0.478         |
| Linear     | $2^{-1}$                | -                          | 0.478         |
| Linear     | $2^1$                   | -                          | 0.6447        |
| Linear     | $2^3$                   | -                          | 0.478         |
| Linear     | $2^5$                   | -                          | 0.4780        |

---

**Random Forest (RF)**

---

| Split criteria<br>(criterion) | # of trees<br>(estimators) | The minimum # of<br>samples in a leaf<br>node<br>(min samples leaf) | Accruacy      |
|-------------------------------|----------------------------|---------------------------------------------------------------------|---------------|
| Gini impurity                 | 100                        | 1                                                                   | 0.7925        |
| Gini impurity                 | 100                        | 2                                                                   | 0.7830        |
| <b>Gini impurity</b>          | <b>100</b>                 | <b>3</b>                                                            | <b>0.8082</b> |
| Gini impurity                 | 100                        | 4                                                                   | 0.7799        |
| Gini impurity                 | 100                        | 5                                                                   | 0.7925        |
| Gini impurity                 | 300                        | 1                                                                   | 0.7987        |
| Gini impurity                 | 300                        | 2                                                                   | 0.7925        |
| Gini impurity                 | 300                        | 3                                                                   | 0.7925        |
| Gini impurity                 | 300                        | 4                                                                   | 0.7925        |
| Gini impurity                 | 300                        | 5                                                                   | 0.7799        |
| Gini impurity                 | 500                        | 1                                                                   | 0.8082        |
| Gini impurity                 | 500                        | 2                                                                   | 0.7956        |
| Gini impurity                 | 500                        | 3                                                                   | 0.7987        |
| Gini impurity                 | 500                        | 4                                                                   | 0.7893        |
| Gini impurity                 | 500                        | 5                                                                   | 0.7956        |
| Gini impurity                 | 700                        | 1                                                                   | 0.8019        |
| Gini impurity                 | 700                        | 2                                                                   | 0.7956        |
| Gini impurity                 | 700                        | 3                                                                   | 0.7956        |
| Gini impurity                 | 700                        | 4                                                                   | 0.7925        |
| Gini impurity                 | 700                        | 5                                                                   | 0.7862        |
| Gini impurity                 | 900                        | 1                                                                   | 0.7925        |
| Gini impurity                 | 900                        | 2                                                                   | 0.7956        |

|               |     |   |        |
|---------------|-----|---|--------|
| Gini impurity | 900 | 3 | 0.7925 |
| Gini impurity | 900 | 4 | 0.7862 |
| Gini impurity | 900 | 5 | 0.7799 |

---

### Logistic Regression (LR)

---

| max_iter<br>(maximum number<br>of iterations to<br>converge) | Penalty parameter (C) | Accuracy      |
|--------------------------------------------------------------|-----------------------|---------------|
| 100                                                          | 0.03125               | 0.7799        |
| 100                                                          | 0.125                 | 0.8239        |
| 100                                                          | 0.5                   | 0.827         |
| 100                                                          | 1                     | 0.8239        |
| <b>100</b>                                                   | <b>2</b>              | <b>0.8333</b> |
| 100                                                          | 8                     | 0.8302        |
| 100                                                          | 32                    | 0.827         |
| 200                                                          | 0.03125               | 0.7799        |
| 200                                                          | 0.125                 | 0.8239        |
| 200                                                          | 0.5                   | 0.827         |
| 200                                                          | 1                     | 0.8239        |
| 200                                                          | 2                     | 0.8333        |
| 200                                                          | 8                     | 0.8302        |
| 200                                                          | 32                    | 0.827         |
| 300                                                          | 0.03125               | 0.7799        |
| 300                                                          | 0.125                 | 0.8239        |
| 300                                                          | 0.5                   | 0.827         |
| 300                                                          | 1                     | 0.8239        |
| 300                                                          | 2                     | 0.8333        |
| 300                                                          | 8                     | 0.8302        |
| 300                                                          | 32                    | 0.827         |
| 400                                                          | 0.03125               | 0.7799        |
| 400                                                          | 0.125                 | 0.8239        |
| 400                                                          | 0.5                   | 0.827         |
| 400                                                          | 1                     | 0.8239        |
| 400                                                          | 2                     | 0.8333        |
| 400                                                          | 8                     | 0.8302        |
| 400                                                          | 32                    | 0.827         |
| 500                                                          | 0.03125               | 0.7799        |
| 500                                                          | 0.125                 | 0.8239        |
| 500                                                          | 0.5                   | 0.827         |
| 500                                                          | 1                     | 0.8239        |
| 500                                                          | 2                     | 0.8333        |
| 500                                                          | 8                     | 0.8302        |
| 500                                                          | 32                    | 0.827         |

---

**SupplementaryMaterial S3.**

Accuracy and weighted F1-score results of moBRCA-net, its variants, and the machine learning-based classifiers from the performance evaluation based on 10-fold cross validation in Fig 2.

**[Accuracy]**

|                | moBRCA-net<br>(omics-attn) | moBRCA-net<br>(single attn) | moBRCA-net<br>(no attn) | SVM    | RF     | LR     | NB     |
|----------------|----------------------------|-----------------------------|-------------------------|--------|--------|--------|--------|
| v1             | 0.8868                     | 0.8962                      | 0.8962                  | 0.8868 | 0.8019 | 0.8774 | 0.7547 |
| v2             | 0.8585                     | 0.8396                      | 0.8302                  | 0.8302 | 0.8113 | 0.8113 | 0.7547 |
| v3             | 0.8585                     | 0.8679                      | 0.8396                  | 0.8208 | 0.7925 | 0.8113 | 0.7264 |
| v4             | 0.934                      | 0.9245                      | 0.8962                  | 0.9057 | 0.8585 | 0.8774 | 0.6981 |
| v5             | 0.9057                     | 0.8396                      | 0.8302                  | 0.8868 | 0.8302 | 0.8113 | 0.7547 |
| v6             | 0.8962                     | 0.9057                      | 0.9057                  | 0.8585 | 0.8585 | 0.8774 | 0.717  |
| v7             | 0.9057                     | 0.8396                      | 0.8962                  | 0.8679 | 0.8585 | 0.8396 | 0.6792 |
| v8             | 0.8868                     | 0.9151                      | 0.9151                  | 0.8679 | 0.7925 | 0.8868 | 0.7358 |
| v9             | 0.9151                     | 0.8962                      | 0.8302                  | 0.9057 | 0.8585 | 0.8774 | 0.7547 |
| v10            | 0.8667                     | 0.8476                      | 0.8476                  | 0.8286 | 0.819  | 0.819  | 0.6857 |
| <b>Average</b> | 0.8914                     | 0.8772                      | 0.8687                  | 0.8659 | 0.8281 | 0.8489 | 0.7261 |

**[Weighted F1-score]**

|                | moBRCA-net<br>(omics-attn) | moBRCA-net<br>(single attn) | moBRCA-net<br>(no attn) | SVM    | RF     | LR     | NB     |
|----------------|----------------------------|-----------------------------|-------------------------|--------|--------|--------|--------|
| v1             | 0.8842                     | 0.8952                      | 0.8952                  | 0.8826 | 0.7673 | 0.8738 | 0.7457 |
| v2             | 0.8556                     | 0.8321                      | 0.8263                  | 0.8274 | 0.7925 | 0.8046 | 0.7728 |
| v3             | 0.842                      | 0.8602                      | 0.8292                  | 0.8096 | 0.759  | 0.7989 | 0.7405 |
| v4             | 0.9338                     | 0.9119                      | 0.8893                  | 0.9017 | 0.8397 | 0.8251 | 0.7078 |
| v5             | 0.9002                     | 0.8321                      | 0.8263                  | 0.8908 | 0.8186 | 0.8643 | 0.7644 |
| v6             | 0.8899                     | 0.9021                      | 0.9051                  | 0.8449 | 0.8278 | 0.8643 | 0.7321 |
| v7             | 0.9052                     | 0.8321                      | 0.8893                  | 0.8605 | 0.8381 | 0.8251 | 0.6895 |
| v8             | 0.8778                     | 0.9123                      | 0.9123                  | 0.8626 | 0.7461 | 0.8624 | 0.7471 |
| v9             | 0.9158                     | 0.8936                      | 0.8263                  | 0.9023 | 0.8421 | 0.875  | 0.773  |
| v10            | 0.8612                     | 0.8518                      | 0.8364                  | 0.83   | 0.8157 | 0.813  | 0.6975 |
| <b>Average</b> | 0.8866                     | 0.8723                      | 0.8636                  | 0.8612 | 0.8047 | 0.8407 | 0.7370 |

**[MCC]**

|                | moBRCA-net<br>(omics-attn) | moBRCA-net<br>(single attn) | moBRCA-net<br>(no attn) | SVM    | RF     | LR     | NB     |
|----------------|----------------------------|-----------------------------|-------------------------|--------|--------|--------|--------|
| v1             | 0.8413                     | 0.8527                      | 0.8527                  | 0.7826 | 0.6844 | 0.7297 | 0.667  |
| v2             | 0.7854                     | 0.755                       | 0.7387                  | 0.8473 | 0.7829 | 0.7831 | 0.6316 |
| v3             | 0.7827                     | 0.8005                      | 0.7579                  | 0.7985 | 0.7676 | 0.7987 | 0.6183 |
| v4             | 0.8939                     | 0.877                       | 0.8601                  | 0.822  | 0.7743 | 0.7608 | 0.5536 |
| v5             | 0.8242                     | 0.8242                      | 0.867                   | 0.8462 | 0.8153 | 0.8407 | 0.6562 |
| v6             | 0.8401                     | 0.8541                      | 0.8564                  | 0.8106 | 0.7162 | 0.7794 | 0.6201 |
| v7             | 0.8625                     | 0.8625                      | 0.8472                  | 0.8206 | 0.7733 | 0.7944 | 0.5302 |
| v8             | 0.8327                     | 0.8737                      | 0.8737                  | 0.821  | 0.8675 | 0.8349 | 0.5809 |
| v9             | 0.8671                     | 0.836                       | 0.836                   | 0.7241 | 0.6948 | 0.7373 | 0.6453 |
| v10            | 0.7759                     | 0.7573                      | 0.7426                  | 0.8106 | 0.7707 | 0.7552 | 0.5997 |
| <b>Average</b> | 0.8306                     | 0.8293                      | 0.8232                  | 0.8084 | 0.7647 | 0.7814 | 0.6103 |

#### SupplementaryMaterial S4.

Average subtype-wise accuracy and weighted F1-score results of moBRCA-net (omics-attn) from the performance evaluation based on 10-fold cross validation in Fig 2.

| <b>Subtype</b> | <b>Accuracy</b> | <b>F1-score</b> |
|----------------|-----------------|-----------------|
| Basal          | 0.9244          | 0.9289          |
| Her2           | 0.9292          | 0.7942          |
| Luminal A      | 0.9603          | 0.7254          |
| Luminal B      | 0.9896          | 0.9737          |
| Normal-like    | 0.5967          | 0.6099          |

**SupplementaryMaterial S5.**

Average overall and subtype-wise performance results of moBRCA-net with/without data augmentation based on 10-fold cross validation.

|          | Overall |       |       | Luminal A |       | Luminal B |       | Basal |       | Her2  |       | Normal-like |       |
|----------|---------|-------|-------|-----------|-------|-----------|-------|-------|-------|-------|-------|-------------|-------|
|          | ACC     | F1    | MCC   | ACC       | F1    | ACC       | F1    | ACC   | F1    | ACC   | F1    | ACC         | F1    |
| w/o aug  | 0.891   | 0.887 | 0.831 | 0.96      | 0.725 | 0.989     | 0.974 | 0.924 | 0.928 | 0.929 | 0.794 | 0.596       | 0.609 |
| with aug | 0.895   | 0.891 | 0.84  | 0.966     | 0.763 | 0.987     | 0.966 | 0.927 | 0.929 | 0.93  | 0.819 | 0.599       | 0.618 |

**SupplementaryMaterial S6.**

Accuracy and weighted F1-score results of moBRCA-net using different feature selection methods in the multi-omics data integration based on 10-fold cross validation in Fig 3.

**[Accuracy]**

|                | <b>CpG cluster</b> |         |        | <b>Single CpG</b> |         |        |
|----------------|--------------------|---------|--------|-------------------|---------|--------|
|                | DEG                | SVM-RFE | RF     | DEG               | SVM-RFE | RF     |
| v1             | 0.8962             | 0.8491  | 0.8396 | 0.8585            | 0.8396  | 0.8208 |
| v2             | 0.8962             | 0.8208  | 0.8396 | 0.8491            | 0.8208  | 0.8396 |
| v3             | 0.8679             | 0.8585  | 0.8491 | 0.8585            | 0.8396  | 0.8302 |
| v4             | 0.9434             | 0.9151  | 0.9057 | 0.8962            | 0.8962  | 0.8208 |
| v5             | 0.9245             | 0.8774  | 0.8868 | 0.8585            | 0.8962  | 0.8585 |
| v6             | 0.9434             | 0.9057  | 0.8868 | 0.9057            | 0.8868  | 0.8774 |
| v7             | 0.9057             | 0.8774  | 0.8774 | 0.8679            | 0.8962  | 0.8774 |
| v8             | 0.9151             | 0.8774  | 0.8396 | 0.8491            | 0.8868  | 0.8396 |
| v9             | 0.9151             | 0.8679  | 0.8868 | 0.8868            | 0.8302  | 0.8585 |
| v10            | 0.8857             | 0.8571  | 0.8952 | 0.8381            | 0.8667  | 0.8774 |
| <b>Average</b> | 0.9093             | 0.8706  | 0.8707 | 0.8668            | 0.8659  | 0.8500 |

**[Weighted F1-score]**

|                | <b>CpG cluster</b> |         |        | <b>Single CpG</b> |         |        |
|----------------|--------------------|---------|--------|-------------------|---------|--------|
|                | DEG                | SVM-RFE | RF     | DEG               | SVM-RFE | RF     |
| v1             | 0.8952             | 0.8464  | 0.8307 | 0.8518            | 0.8307  | 0.8227 |
| v2             | 0.8937             | 0.8230  | 0.8320 | 0.8431            | 0.8164  | 0.8320 |
| v3             | 0.8602             | 0.8502  | 0.8464 | 0.8450            | 0.8332  | 0.8222 |
| v4             | 0.9426             | 0.9108  | 0.8985 | 0.8885            | 0.8901  | 0.8227 |
| v5             | 0.9268             | 0.8792  | 0.8861 | 0.8585            | 0.8884  | 0.8530 |
| v6             | 0.9448             | 0.9004  | 0.8861 | 0.9121            | 0.8861  | 0.8700 |
| v7             | 0.9052             | 0.8728  | 0.8698 | 0.8672            | 0.8933  | 0.8698 |
| v8             | 0.9123             | 0.8786  | 0.8319 | 0.8415            | 0.8832  | 0.8319 |
| v9             | 0.9158             | 0.8625  | 0.8832 | 0.8764            | 0.8135  | 0.8537 |
| v10            | 0.8829             | 0.8341  | 0.8951 | 0.8515            | 0.8651  | 0.8698 |
| <b>Average</b> | 0.9080             | 0.8658  | 0.8660 | 0.8636            | 0.8600  | 0.8448 |



# SupplementaryMaterial S7. Normalized values of features showing top 3 to 5 average attention scores from each omics

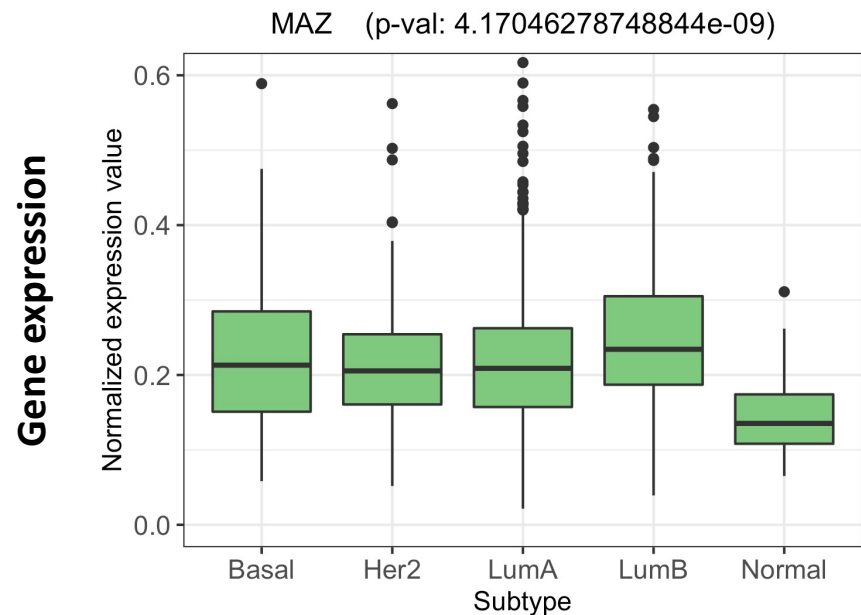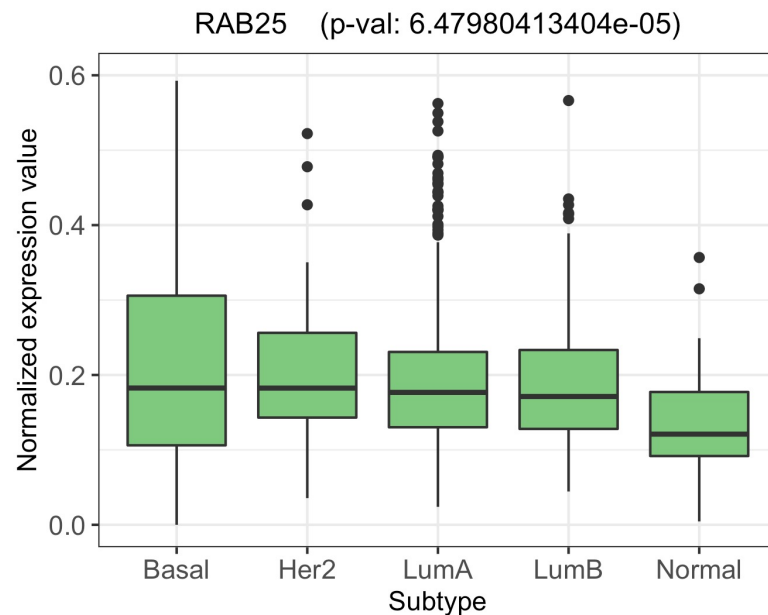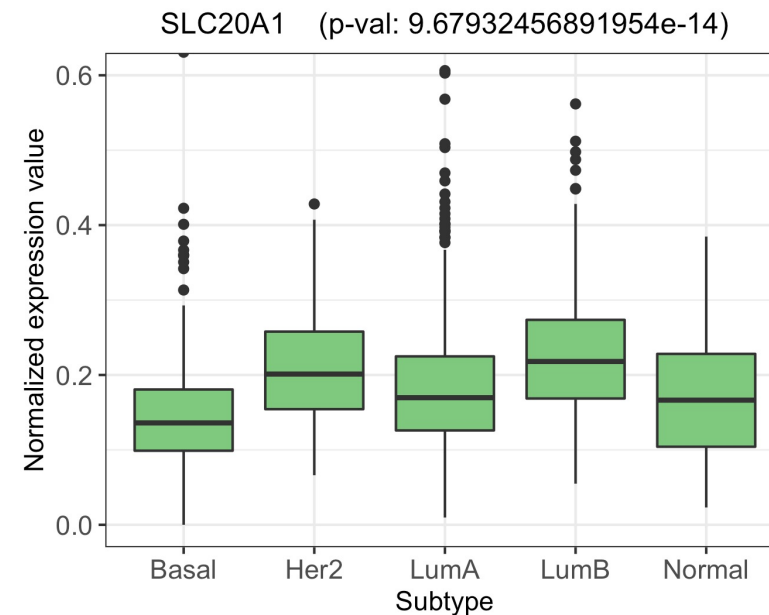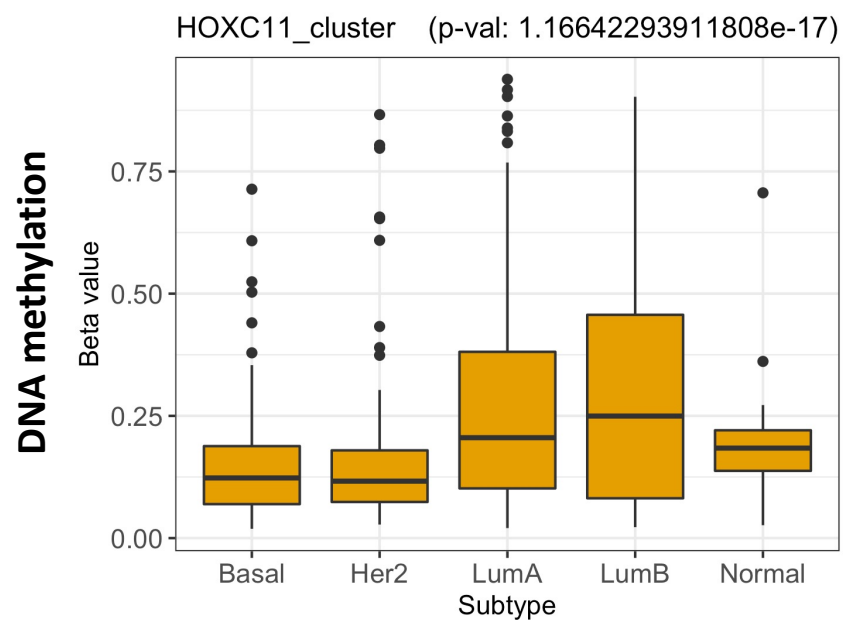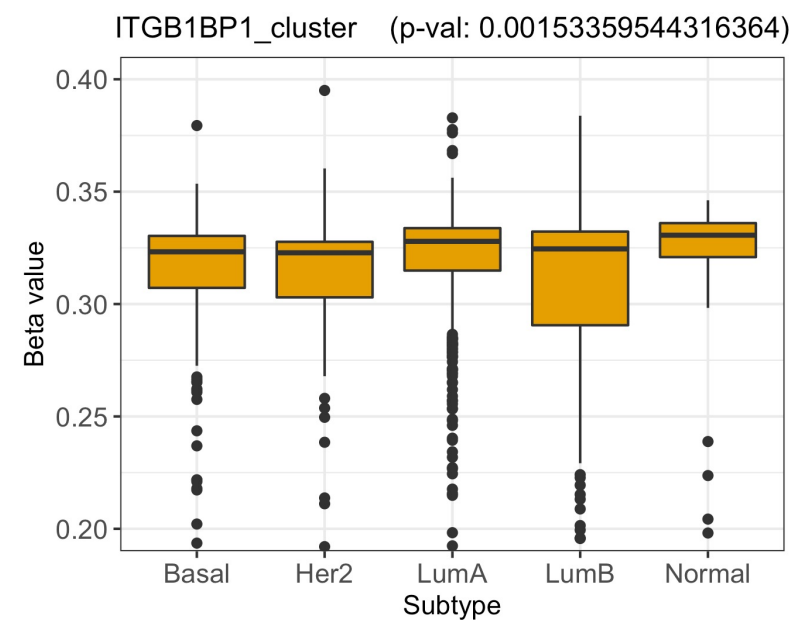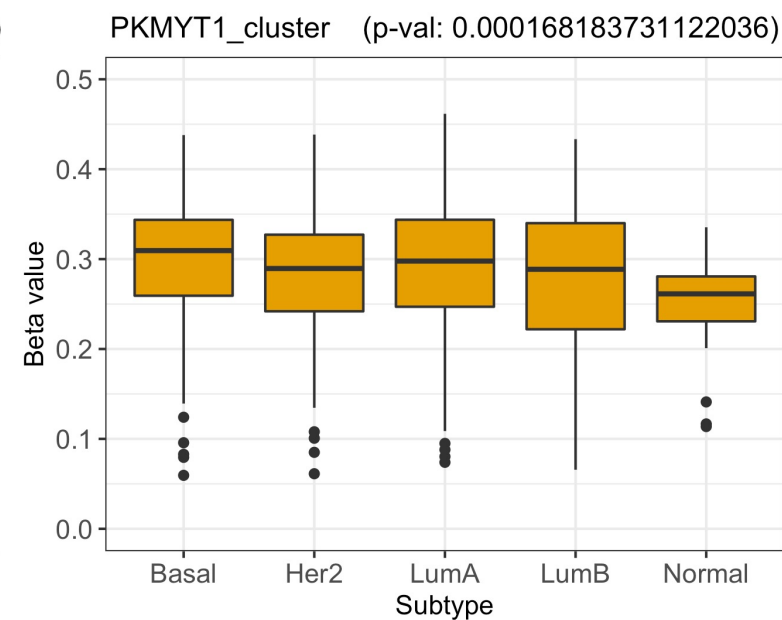

**SupplementaryMaterial S7.** Normalized values of features showing top 3 to 5 average attention scores from each omics

**microRNA**

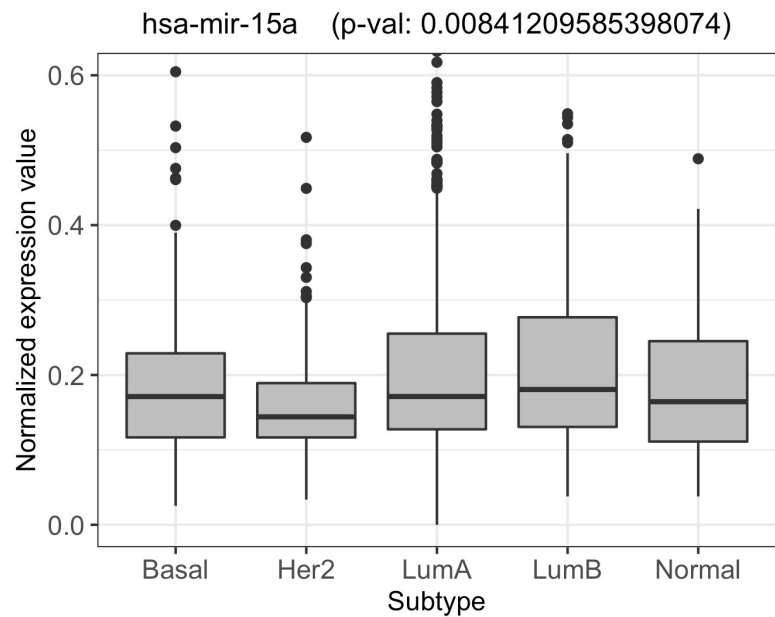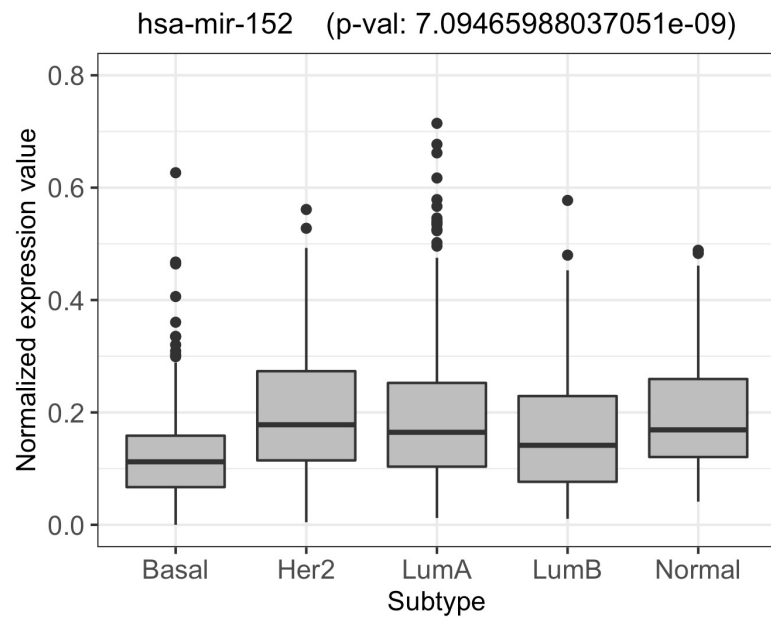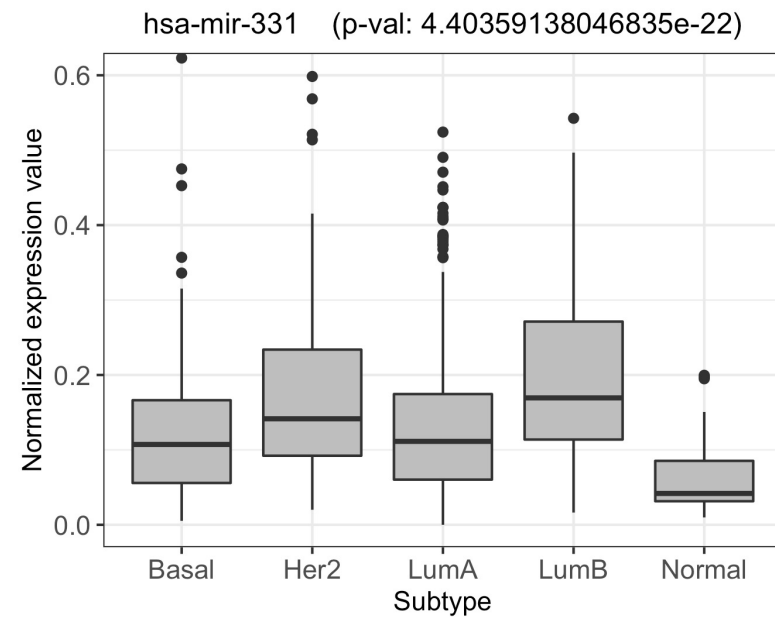

**SupplementaryMaterial S8.**

Top 200 features showing the highest average attention scores across patients for each omics dataset.

| <b>Gene</b> |
|-------------|
| EZH1        |
| HDGF        |
| MAZ         |
| RAB25       |
| SLC20A1     |
| TK2         |
| STAT5B      |
| TJP3        |
| ESRP1       |
| SLC25A39    |
| TIMM17A     |
| AHNAK       |
| GPRASP2     |
| EHD2        |
| NKAIN1      |
| TPM3        |
| NACC1       |
| PDP2        |
| LIG1        |
| CBX4        |
| RETSAT      |
| STMN1       |
| JTB         |
| RBP7        |
| PCYOX1      |
| ZNF48       |
| SEPHS2      |
| KIF15       |
| RHOQ        |
| ASPM        |
| ZCCHC24     |
| FERMT2      |
| TROAP       |
| CDCA4       |
| KIF22       |
| ESPL1       |
| HNRNPAB     |
| TARS2       |
| HIST1H2BD   |
| CHEK1       |
| LTBP4       |
| SNTB2       |
| KLF9        |
| TMEM140     |
| TUBA1C      |
| MRAS        |
| TOR3A       |

KANK1  
NEK2  
ATAD2  
ERG  
MMRN2  
TMEM8A  
SNRNP25  
EHBP1  
FAM126A  
MKI67  
PPP1CA  
CENPI  
GSN  
PPP4C  
KIF24  
ARHGEF15  
KCTD13  
ACAA2  
CLEC5A  
MGLL  
WDR34  
TRIB3  
PER2  
MCM2  
ITGB1BP1  
GTF2IRD1  
CKAP2L  
SORBS1  
KIF23  
ZWINT  
H2AFZ  
NDC80  
CDK5  
KAT2B  
POLR2H  
MICAL2  
SDC1  
ADAM8  
STBD1  
CCT3  
NR3C1  
CANT1  
HOXC13  
NUP210  
H2AFY  
TEF  
SRMS  
GPRASP1  
CSRP1  
CACNB3  
CEP68

CENPO  
PACSIN1  
EPM2A  
RUVBL1  
F10  
NR2F6  
MANF  
SPC25  
IQGAP3  
SCAMP3  
STAT5A  
RAD51  
RABIF  
LMNB1  
KIF4A  
DLC1  
MAML2  
SPINT2  
RAD54L  
ELMOD3  
HELLS  
FLAD1  
LRWD1  
MFAP4  
GPR68  
ROGDI  
DLGAP5  
CCDC69  
PNPLA2  
ST6GALNAC6  
LMOD1  
TLN2  
GYG2  
FOXP3  
RELT  
B4GALT3  
NDRG2  
ARF1  
STRBP  
CENPE  
INHBA  
PKD2  
PPP1R12B  
SH3BGRL2  
SLC25A22  
XRCC2  
MMD  
LEPR  
RUSC1  
AMOTL2  
TGFB3

KLF11  
BCL9  
C2CD2  
LDB2  
LRRN4CL  
ANO6  
TRAIP  
HABP4  
RNASEH2A  
CFL1  
GPRIN1  
REEP4  
ADHFE1  
RCC2  
FKBP4  
THSD1  
VAV2  
TSTA3  
RNFT2  
FADS3  
NAT8L  
JAM2  
GGCT  
KLF6  
TXNIP  
RBMS2  
PLXNA3  
SPTBN1  
C9orf116  
KL  
TNFSF4  
LEF1  
DNASE1L2  
CALCOCO1  
FOXN3  
FBXL6  
CTHRC1  
TMEM206  
CDCA8  
RCBTB2  
STX11  
PDLIM3  
CDC25C  
MAPK8IP2  
EPB41L2  
CAT  
HM13  
GTSE1  
DAB2IP  
TMED3  
KLF10

---

| <b>ClusterName</b> | <b>cpg</b> |
|--------------------|------------|
| TNS1_cluster       | cg18328334 |
| SLC22A3_cluster    | cg07237939 |
| SLC22A3_cluster    | cg25313204 |
| HOXC11_cluster     | cg07123069 |
| HOXC11_cluster     | cg22709192 |
| ITGB1BP1_cluster   | cg00024812 |
| ITGB1BP1_cluster   | cg23889771 |
| ITGB1BP1_cluster   | cg26306976 |
| PKMYT1_cluster     | cg00319761 |
| PKMYT1_cluster     | cg02510853 |
| ADIPOQ_cluster     | cg03573747 |
| CA9_cluster        | cg19257550 |
| CA9_cluster        | cg20610181 |
| MCAM_cluster       | cg03365354 |
| MCAM_cluster       | cg21096399 |
| NRN1_cluster       | cg11504897 |
| NRN1_cluster       | cg25511429 |
| RASSF7_cluster     | cg00216758 |
| RASSF7_cluster     | cg14896003 |
| RASSF7_cluster     | cg16000888 |
| GABRD_cluster      | cg06063714 |
| GABRD_cluster      | cg24087944 |
| HOXC13_cluster     | cg20587394 |
| KCTD12_cluster     | cg12280407 |
| KCTD12_cluster     | cg15901783 |
| KRT8_cluster       | cg01835489 |
| KRT8_cluster       | cg20324165 |
| CBX2_cluster       | cg06162003 |
| CBX2_cluster       | cg22892904 |
| TPD52_cluster      | cg18459342 |
| TMC2_cluster       | cg03243506 |
| TMC2_cluster       | cg19290962 |
| GNG11_cluster      | cg22983529 |
| FAM110A_cluster    | cg20289911 |
| DEFB132_cluster    | cg18239253 |
| ERG_cluster        | cg03127334 |
| ERG_cluster        | cg17274064 |
| MYBL2_cluster      | cg09604203 |
| MYBL2_cluster      | cg23843505 |
| ADAMTS5_cluster    | cg08190291 |
| ADAMTS5_cluster    | cg18895813 |
| ESPL1_cluster      | cg03815350 |
| ESPL1_cluster      | cg13445358 |
| CDH13_cluster      | cg00806490 |
| CDH13_cluster      | cg01880569 |
| CDH13_cluster      | cg08747377 |
| CDH13_cluster      | cg08977371 |
| CDH13_cluster      | cg19369556 |

|                 |            |
|-----------------|------------|
| CDH13_cluster   | cg19854301 |
| MMP11_cluster   | cg27532722 |
| SAA1_cluster    | cg15484375 |
| FGF2_cluster    | cg17214107 |
| FGF2_cluster    | cg25583174 |
| HMGB3_cluster   | cg05935584 |
| MASP1_cluster   | cg20725021 |
| MASP1_cluster   | cg21831174 |
| MS4A15_cluster  | cg19105504 |
| MS4A15_cluster  | cg25072962 |
| MUC1_cluster    | cg07399355 |
| MUC1_cluster    | cg17257175 |
| MUC1_cluster    | cg24512973 |
| FMO2_cluster    | cg14721213 |
| MME_cluster     | cg16580737 |
| MME_cluster     | cg23273897 |
| CCT3_cluster    | cg18388972 |
| CCT3_cluster    | cg18993334 |
| CCT3_cluster    | cg24042452 |
| GSN_cluster     | cg17071957 |
| RECQL4_cluster  | cg03144357 |
| RECQL4_cluster  | cg15857475 |
| RECQL4_cluster  | cg21092687 |
| TRDN_cluster    | cg14462830 |
| SYNGR3_cluster  | cg26486663 |
| PLSCR4_cluster  | cg04959837 |
| PLSCR4_cluster  | cg24315815 |
| VGf_cluster     | cg04084157 |
| VGf_cluster     | cg08097755 |
| CCDC69_cluster  | cg08317263 |
| PACSIN1_cluster | cg23043245 |
| PACSIN1_cluster | cg23239444 |
| TGFBR3_cluster  | cg00563926 |
| TGFBR3_cluster  | cg16382382 |
| COL1A1_cluster  | cg01234133 |
| COL1A1_cluster  | cg01593886 |
| BUB3_cluster    | cg04058169 |
| BUB3_cluster    | cg23724447 |
| SLC7A10_cluster | cg00910067 |
| SLC7A10_cluster | cg05976074 |
| CHRNA6_cluster  | cg07906724 |
| TSTA3_cluster   | cg00311768 |
| TSTA3_cluster   | cg19150884 |
| CIB3_cluster    | cg09424896 |
| CIB3_cluster    | cg09686308 |
| FAM49A_cluster  | cg10106284 |
| FAM49A_cluster  | cg24242519 |
| DST_cluster     | cg04452713 |
| CILP2_cluster   | cg10313673 |
| CILP2_cluster   | cg10669058 |
| EPAS1_cluster   | cg17518825 |



|                 |            |
|-----------------|------------|
| TJP3_cluster    | cg27022827 |
| PRAME_cluster   | cg05208878 |
| PAX7_cluster    | cg07536847 |
| PAX7_cluster    | cg11428724 |
| NAT8L_cluster   | cg21269934 |
| TMEM8A_cluster  | cg01940867 |
| TMEM8A_cluster  | cg10805676 |
| TSLP_cluster    | cg15089387 |
| TSLP_cluster    | cg15739437 |
| ESM1_cluster    | cg07233761 |
| ESM1_cluster    | cg20451680 |
| AOC3_cluster    | cg09040752 |
| AOC3_cluster    | cg21602160 |
| COMP_cluster    | cg09949775 |
| COMP_cluster    | cg15784332 |
| EGR2_cluster    | cg19355190 |
| CA3_cluster     | cg18674980 |
| CA3_cluster     | cg22289837 |
| CHL1_cluster    | cg00903242 |
| NKX3-2_cluster  | cg11392765 |
| NKX3-2_cluster  | cg20073553 |
| ENPP2_cluster   | cg14409958 |
| PPP1CA_cluster  | cg13055001 |
| ATP1A3_cluster  | cg07051960 |
| ATP1A3_cluster  | cg23920441 |
| ANK2_cluster    | cg02735486 |
| TAL1_cluster    | cg00875272 |
| TAL1_cluster    | cg19797376 |
| HIF3A_cluster   | cg02879662 |
| PRKAR2B_cluster | cg21250978 |
| STAT5A_cluster  | cg03001305 |
| STAT5A_cluster  | cg16777510 |
| MRGPRF_cluster  | cg22933847 |
| MRGPRF_cluster  | cg22986999 |
| CA4_cluster     | cg04532952 |
| CA4_cluster     | cg18743730 |
| CSAG1_cluster   | cg02504280 |
| HOXB13_cluster  | cg15786837 |
| HOXB13_cluster  | cg21842478 |
| PDE3B_cluster   | cg03439703 |
| PDE3B_cluster   | cg05532892 |
| PDE3B_cluster   | cg14400631 |
| PDE3B_cluster   | cg27143049 |
| GNG13_cluster   | cg14100184 |
| BGN_cluster     | cg19618706 |
| PAK3_cluster    | cg14688956 |
| PAK3_cluster    | cg14708847 |
| CRIM1_cluster   | cg00850538 |
| CRIM1_cluster   | cg10881306 |
| APCDD1_cluster  | cg19264571 |
| APCDD1_cluster  | cg26328002 |

|                  |            |
|------------------|------------|
| FBXL6_cluster    | cg16628918 |
| FBXL6_cluster    | cg21959619 |
| FBXL6_cluster    | cg26403198 |
| PNPLA2_cluster   | cg22016649 |
| PNPLA2_cluster   | cg24427660 |
| LGALS12_cluster  | cg11484576 |
| HIST1H3J_cluster | cg17965019 |
| CELSR3_cluster   | cg06621358 |
| CELSR3_cluster   | cg09736162 |
| MATN2_cluster    | cg10039928 |
| MATN2_cluster    | cg16202564 |
| SRPX_cluster     | cg23750556 |
| LILRB5_cluster   | cg08684473 |
| LILRB5_cluster   | cg20649991 |
| CCR8_cluster     | cg26647600 |
| HAGHL_cluster    | cg10163825 |
| RECK_cluster     | cg03081134 |
| RECK_cluster     | cg12717594 |
| ADCY4_cluster    | cg12265829 |
| ADCY4_cluster    | cg16761581 |
| ADAM33_cluster   | cg14089692 |
| ADAM33_cluster   | cg22333888 |
| RNASEH2A_cluster | cg05657090 |
| RNASEH2A_cluster | cg24056562 |
| EDNRB_cluster    | cg03086857 |
| EDNRB_cluster    | cg12120741 |
| EDNRB_cluster    | cg12847373 |
| EDNRB_cluster    | cg15836660 |
| EDNRB_cluster    | cg23316360 |
| EDNRB_cluster    | cg24745738 |
| SLC29A4_cluster  | cg05168404 |
| CCDC3_cluster    | cg22750254 |
| CLEC1A_cluster   | cg07959477 |
| CLEC1A_cluster   | cg13354523 |
| CHRNA9_cluster   | cg10375110 |
| CEP55_cluster    | cg24371383 |
| ALDH1L1_cluster  | cg07800320 |
| ALDH1L1_cluster  | cg16312163 |
| SCN4B_cluster    | cg17186803 |
| SCN4B_cluster    | cg27560864 |
| DMRT2_cluster    | cg00250430 |
| DMRT2_cluster    | cg11530960 |
| ATP6AP1_cluster  | cg18742441 |
| PKD2_cluster     | cg23916751 |
| PKD2_cluster     | cg26215428 |
| BMP8A_cluster    | cg03664992 |
| PPP4C_cluster    | cg11970301 |
| PPP4C_cluster    | cg21742836 |
| CASP14_cluster   | cg01999333 |
| HAPLN1_cluster   | cg06434428 |
| HAPLN1_cluster   | cg09893305 |

|                   |            |
|-------------------|------------|
| LDB2_cluster      | cg03368758 |
| LDB2_cluster      | cg08899626 |
| HSD17B7_cluster   | cg04469686 |
| HSD17B7_cluster   | cg07774025 |
| SOX17_cluster     | cg02919422 |
| LEP_cluster       | cg12782180 |
| LEP_cluster       | cg19594666 |
| CEACAM6_cluster   | cg26813458 |
| CIDEA_cluster     | cg19883905 |
| CIDEA_cluster     | cg20950011 |
| MAOA_cluster      | cg15014034 |
| MAOA_cluster      | cg19441691 |
| ARHGEF15_cluster  | cg12989650 |
| ARHGEF15_cluster  | cg19537511 |
| KIF4A_cluster     | cg16256230 |
| GINS2_cluster     | cg19890739 |
| GINS2_cluster     | cg23871933 |
| RRM2_cluster      | cg02237186 |
| RRM2_cluster      | cg18623836 |
| AGPAT2_cluster    | cg15720535 |
| AGPAT2_cluster    | cg25537774 |
| SPARCL1_cluster   | cg19466563 |
| HSD17B13_cluster  | cg08815403 |
| HSD17B13_cluster  | cg24999727 |
| DDR2_cluster      | cg22740835 |
| IRF7_cluster      | cg00645579 |
| IRF7_cluster      | cg16541031 |
| HBA1_cluster      | cg10647513 |
| PTK6_cluster      | cg21484834 |
| CD80_cluster      | cg21572897 |
| CRB3_cluster      | cg03258472 |
| NNAT_cluster      | cg23566503 |
| TSPAN7_cluster    | cg20450764 |
| TSPAN7_cluster    | cg21516819 |
| HIST1H2BJ_cluster | cg04424621 |
| HIST1H2BJ_cluster | cg08717396 |
| HOXA5_cluster     | cg02248486 |
| HOXA5_cluster     | cg12128839 |
| SLC25A39_cluster  | cg03192551 |
| SLC25A39_cluster  | cg24497270 |
| CBX4_cluster      | cg04398978 |
| CBX4_cluster      | cg17533847 |
| NDRG2_cluster     | cg14030359 |
| NDRG2_cluster     | cg18081258 |
| MAB21L1_cluster   | cg05093686 |
| PDK4_cluster      | cg04498739 |
| PDK4_cluster      | cg22171829 |
| HIST1H2AI_cluster | cg10046620 |
| TNNT1_cluster     | cg07189381 |
| TNNT1_cluster     | cg19504245 |
| RGL1_cluster      | cg03125090 |

|                  |            |
|------------------|------------|
| RGL1_cluster     | cg11505048 |
| TNXB_cluster     | cg03543593 |
| TNXB_cluster     | cg13823701 |
| ARTN_cluster     | cg06207804 |
| ARTN_cluster     | cg22930187 |
| MYT1_cluster     | cg10071275 |
| KLB_cluster      | cg21880903 |
| KLB_cluster      | cg27558666 |
| GJB2_cluster     | cg02861781 |
| GJB2_cluster     | cg11054936 |
| GYPC_cluster     | cg17105014 |
| KLF11_cluster    | cg02983451 |
| NPR2_cluster     | cg12876594 |
| PER1_cluster     | cg16545079 |
| RBP7_cluster     | cg03406535 |
| NCAPH_cluster    | cg01906055 |
| NCAPH_cluster    | cg26625319 |
| SRMS_cluster     | cg03330516 |
| POLR3K_cluster   | cg11876012 |
| POLR3K_cluster   | cg14820573 |
| TMEM145_cluster  | cg02456292 |
| ANGPT1_cluster   | cg09396217 |
| CASQ2_cluster    | cg05190718 |
| CASQ2_cluster    | cg18942631 |
| IGF1_cluster     | cg01305421 |
| ORAI2_cluster    | cg02564523 |
| TPM3_cluster     | cg24490338 |
| KIT_cluster      | cg27154163 |
| CCL14_cluster    | cg09256683 |
| NOTCH4_cluster   | cg05973262 |
| NOTCH4_cluster   | cg14700707 |
| PAMR1_cluster    | cg14542839 |
| PAMR1_cluster    | cg14642338 |
| MARCKSL1_cluster | cg06434451 |
| MARCKSL1_cluster | cg09327628 |
| HEPACAM_cluster  | cg06142324 |
| CAPSL_cluster    | cg10994379 |
| CAPSL_cluster    | cg24202119 |
| COL11A1_cluster  | cg12884406 |
| COL11A1_cluster  | cg26256793 |
| FAM89A_cluster   | cg00679738 |
| FAM89A_cluster   | cg16516400 |
| JAM2_cluster     | cg03382304 |
| PLXNA3_cluster   | cg07428182 |
| LTBP4_cluster    | cg25723866 |
| IGFBP6_cluster   | cg01773854 |
| IGFBP6_cluster   | cg08629913 |
| IGFBP6_cluster   | cg23841186 |
| EBF3_cluster     | cg06139836 |
| TACC1_cluster    | cg04017769 |
| TACC1_cluster    | cg09990086 |

|                   |            |
|-------------------|------------|
| FBN2_cluster      | cg25084878 |
| FBN2_cluster      | cg27223047 |
| TLX1_cluster      | cg11498156 |
| TLX1_cluster      | cg16715722 |
| GNAL_cluster      | cg09331011 |
| GNAL_cluster      | cg14371329 |
| GIPC2_cluster     | cg09107315 |
| GIPC2_cluster     | cg24496666 |
| RUSC1_cluster     | cg11503744 |
| RUSC1_cluster     | cg22234962 |
| RUSC1_cluster     | cg23060239 |
| AKAP6_cluster     | cg24812523 |
| NAALAD2_cluster   | cg05500015 |
| NAALAD2_cluster   | cg21500966 |
| TIMP4_cluster     | cg25982743 |
| HIST1H2BE_cluster | cg21146268 |
| MYOM2_cluster     | cg21132577 |
| LAGE3_cluster     | cg20641280 |
| LAGE3_cluster     | cg25410279 |
| CXCL12_cluster    | cg00499822 |
| CXCL12_cluster    | cg18618334 |
| HLF_cluster       | cg04219321 |
| FGF1_cluster      | cg08816023 |
| FGF1_cluster      | cg19954000 |
| MAMDC2_cluster    | cg11656547 |
| MAMDC2_cluster    | cg13870494 |
| HTR1D_cluster     | cg08872493 |
| HTR1D_cluster     | cg20887241 |
| FBLN5_cluster     | cg14974772 |
| FBLN5_cluster     | cg24777065 |
| RDH5_cluster      | cg02192520 |
| RDH5_cluster      | cg17243643 |
| CNN1_cluster      | cg12854483 |
| KLHL4_cluster     | cg07897414 |

---



---



---

**microRNA**

hsa-mir-99b  
 hsa-let-7d  
 hsa-mir-331  
 hsa-mir-15a  
 hsa-mir-152  
 hsa-mir-324  
 hsa-mir-151a  
 hsa-mir-200c  
 hsa-mir-374a  
 hsa-mir-200a  
 hsa-mir-190b  
 hsa-mir-146b  
 hsa-mir-22  
 hsa-mir-27a

hsa-mir-190a  
hsa-let-7i  
hsa-mir-98  
hsa-mir-421  
hsa-mir-1306  
hsa-mir-342  
hsa-mir-200b  
hsa-mir-30b  
hsa-mir-32  
hsa-mir-3064  
hsa-mir-93  
hsa-mir-1249  
hsa-mir-141  
hsa-mir-23b  
hsa-mir-326  
hsa-mir-100  
hsa-mir-106b  
hsa-mir-29c  
hsa-mir-365a  
hsa-mir-21  
hsa-mir-96  
hsa-mir-134  
hsa-mir-186  
hsa-mir-145  
hsa-mir-328  
hsa-mir-29a  
hsa-mir-34a  
hsa-mir-148b  
hsa-mir-338  
hsa-mir-497  
hsa-mir-346  
hsa-mir-1271  
hsa-mir-142  
hsa-mir-149  
hsa-mir-877  
hsa-mir-155  
hsa-mir-26b  
hsa-mir-874  
hsa-mir-503  
hsa-mir-30e  
hsa-mir-182  
hsa-mir-542  
hsa-mir-199b  
hsa-mir-744  
hsa-mir-379  
hsa-mir-28  
hsa-mir-378a  
hsa-mir-424  
hsa-mir-210  
hsa-mir-455  
hsa-mir-193a

hsa-mir-125a  
hsa-mir-551b  
hsa-mir-499a  
hsa-let-7e  
hsa-mir-301a  
hsa-let-7g  
hsa-mir-192  
hsa-mir-146a  
hsa-mir-188  
hsa-mir-139  
hsa-mir-191  
hsa-mir-195  
hsa-mir-23a  
hsa-mir-20a  
hsa-mir-30a  
hsa-mir-760  
hsa-mir-143  
hsa-mir-502  
hsa-mir-107  
hsa-mir-205  
hsa-mir-221  
hsa-mir-215  
hsa-mir-381  
hsa-mir-330  
hsa-mir-411  
hsa-mir-99a  
hsa-mir-454  
hsa-mir-33a  
hsa-mir-876  
hsa-mir-377  
hsa-mir-365b  
hsa-mir-320a  
hsa-mir-1224  
hsa-mir-296  
hsa-mir-185  
hsa-mir-429  
hsa-mir-615  
hsa-mir-374b  
hsa-mir-130a  
hsa-mir-193b  
hsa-mir-425  
hsa-mir-15b  
hsa-let-7b  
hsa-mir-216b  
hsa-mir-202  
hsa-mir-30d  
hsa-mir-135b  
hsa-mir-582  
hsa-mir-382  
hsa-mir-33b  
hsa-mir-501

hsa-mir-212  
hsa-mir-361  
hsa-mir-409  
hsa-mir-10a  
hsa-mir-19a  
hsa-mir-27b  
hsa-mir-339  
hsa-mir-106a  
hsa-mir-590  
hsa-mir-708  
hsa-mir-452  
hsa-mir-17  
hsa-mir-136  
hsa-mir-551a  
hsa-mir-1197  
hsa-mir-491  
hsa-mir-668  
hsa-mir-148a  
hsa-mir-129-1  
hsa-mir-449b  
hsa-mir-92b  
hsa-mir-448  
hsa-mir-362  
hsa-mir-222  
hsa-mir-214  
hsa-mir-363  
hsa-mir-490  
hsa-mir-140  
hsa-mir-340  
hsa-mir-25  
hsa-mir-1251  
hsa-mir-335  
hsa-mir-130b  
hsa-mir-223  
hsa-mir-410  
hsa-mir-494  
hsa-mir-10b  
hsa-mir-20b  
hsa-mir-373  
hsa-mir-758  
hsa-let-7c  
hsa-mir-655  
hsa-mir-208a  
hsa-mir-18a  
hsa-mir-150  
hsa-mir-506  
hsa-mir-423  
hsa-mir-6835  
hsa-mir-532  
hsa-mir-665  
hsa-mir-18b



hsa-mir-1193  
hsa-mir-154  
hsa-mir-539  
hsa-mir-224  
hsa-mir-433  
hsa-mir-301b  
hsa-mir-375  
hsa-mir-302a  
hsa-mir-299  
hsa-mir-181d  
hsa-mir-196b  
hsa-mir-34c  
hsa-mir-369  
hsa-mir-495  
hsa-mir-493  
hsa-mir-211  
hsa-mir-219a-2  
hsa-mir-543  
hsa-mir-181c  
hsa-mir-372  
hsa-mir-184  
hsa-mir-485  
hsa-mir-129-2  
hsa-mir-302b  
hsa-mir-31  
hsa-mir-323a  
hsa-mir-431  
hsa-mir-208b  
hsa-mir-132  
hsa-mir-23c  
hsa-mir-488  
hsa-mir-487a  
hsa-mir-376b

---

**SupplementaryMaterial S9.**

53 overlapped genes with the gene set collection from MSigDB and PAM50, among the top 200 genes showing the highest average attention scores across patients

| <b>Gene</b> | <b>Gene set collection name</b>   |
|-------------|-----------------------------------|
| TK2         | SMID_BREAST_CANCER_BASAL_DN       |
| TJP3        | SMID_BREAST_CANCER_BASAL_DN       |
| AHNAK       | SMID_BREAST_CANCER_BASAL_DN       |
| NKAIN1      | SMID_BREAST_CANCER_BASAL_DN       |
| ZCCHC24     | SMID_BREAST_CANCER_BASAL_DN       |
| CANT1       | SMID_BREAST_CANCER_BASAL_DN       |
| MFAP4       | SMID_BREAST_CANCER_BASAL_DN       |
| PNPLA2      | SMID_BREAST_CANCER_BASAL_DN       |
| ASPM        | SMID_BREAST_CANCER_BASAL_UP       |
| CHEK1       | SMID_BREAST_CANCER_BASAL_UP       |
| MRAS        | SMID_BREAST_CANCER_BASAL_UP       |
| NEK2        | SMID_BREAST_CANCER_BASAL_UP       |
| ATAD2       | SMID_BREAST_CANCER_BASAL_UP       |
| MKI67       | SMID_BREAST_CANCER_BASAL_UP       |
| MCM2        | SMID_BREAST_CANCER_BASAL_UP       |
| NDC80       | SMID_BREAST_CANCER_BASAL_UP       |
| RAD54L      | SMID_BREAST_CANCER_BASAL_UP       |
| HELLS       | SMID_BREAST_CANCER_BASAL_UP       |
| DLGAP5      | SMID_BREAST_CANCER_BASAL_UP       |
| NDRG2       | SMID_BREAST_CANCER_BASAL_UP       |
| CENPE       | SMID_BREAST_CANCER_BASAL_UP       |
| KLF6        | SMID_BREAST_CANCER_BASAL_UP       |
| CDCA8       | SMID_BREAST_CANCER_BASAL_UP       |
| EPB41L2     | SMID_BREAST_CANCER_BASAL_UP       |
| GTSE1       | SMID_BREAST_CANCER_BASAL_UP       |
| NDC80       | SMID_BREAST_CANCER_LUMINAL_A_DN   |
| CDCA8       | SMID_BREAST_CANCER_LUMINAL_A_DN   |
| MFAP4       | SMID_BREAST_CANCER_LUMINAL_A_UP   |
| LMOD1       | SMID_BREAST_CANCER_LUMINAL_A_UP   |
| LEPR        | SMID_BREAST_CANCER_LUMINAL_A_UP   |
| FERMT2      | SMID_BREAST_CANCER_LUMINAL_B_DN   |
| MRAS        | SMID_BREAST_CANCER_LUMINAL_B_DN   |
| MFAP4       | SMID_BREAST_CANCER_LUMINAL_B_DN   |
| NDRG2       | SMID_BREAST_CANCER_LUMINAL_B_DN   |
| LEPR        | SMID_BREAST_CANCER_LUMINAL_B_DN   |
| KLF6        | SMID_BREAST_CANCER_LUMINAL_B_DN   |
| EPB41L2     | SMID_BREAST_CANCER_LUMINAL_B_DN   |
| TJP3        | SMID_BREAST_CANCER_LUMINAL_B_UP   |
| NKAIN1      | SMID_BREAST_CANCER_LUMINAL_B_UP   |
| EZH1        | SMID_BREAST_CANCER_NORMAL_LIKE_UP |
| SORBS1      | SMID_BREAST_CANCER_NORMAL_LIKE_UP |
| F10         | SMID_BREAST_CANCER_NORMAL_LIKE_UP |
| MFAP4       | SMID_BREAST_CANCER_NORMAL_LIKE_UP |
| CCDC69      | SMID_BREAST_CANCER_NORMAL_LIKE_UP |

|        |                                   |
|--------|-----------------------------------|
| LMOD1  | SMID_BREAST_CANCER_NORMAL_LIKE_UP |
| LEPR   | SMID_BREAST_CANCER_NORMAL_LIKE_UP |
| TGFBR3 | SMID_BREAST_CANCER_NORMAL_LIKE_UP |
| TXNIP  | SMID_BREAST_CANCER_NORMAL_LIKE_UP |
| LEF1   | SMID_BREAST_CANCER_NORMAL_LIKE_UP |
| FOXN3  | SMID_BREAST_CANCER_NORMAL_LIKE_UP |
| NDC80  | PAM50                             |
| MKI67  | PAM50                             |

---
